# Supplementary material for: COVID-19 associated pulmonary aspergillosis in critically-ill patients: a prospective multicenter study in the era of Delta and Omicron variants
Source: Springer Nature journal article supplement (doi:10.1186/s13613-024-01296-0), 2024-04-24
Supplement: MOESM3 [file 13613_2024_1296_MOESM3_ESM.pdf]

**Table S2. Predictors of CAPA occurrence by univariable and multivariable logistic regression models in critically ill patients with COVID-19: results on raw data (n=566).**

| Factor                               | Univariable Analysis |             |              | Multivariable Analysis |                 |              |
|--------------------------------------|----------------------|-------------|--------------|------------------------|-----------------|--------------|
|                                      | OR                   | 95%CI       | p-value      | aOR                    | 95%CI           | p-value      |
| Blood leukocytes, G/L                | 1.02                 | (1.00;1.05) | <b>0.019</b> |                        |                 |              |
| SAPS II score                        | 1.02                 | (1.00;1.05) | <b>0.043</b> | <b>1.03</b>            | <b>(1;1.06)</b> | <b>0.03</b>  |
| Age, years                           | 1.00                 | (0.98;1.03) | 0.74         |                        |                 |              |
| Gender, females                      | 0.74                 | (0.32;1.70) | 0.473        |                        |                 |              |
| SOFA score                           | 1.12                 | (1.00;1.25) | <b>0.041</b> |                        |                 |              |
| Serum urea level, mM                 | 1.01                 | (0.99;1.03) | 0.384        |                        |                 |              |
| First symptoms - ICU admission, days | 1.01                 | (1.00;1.06) | <b>0.043</b> | <b>1.03</b>            | <b>(1-1.06)</b> | <b>0.024</b> |
| Invasive mechanical ventilation      | 2.02                 | (0.93;4.38) | 0.077        |                        |                 |              |
| Immunosuppression                    | 2.28                 | (1.06;4.90) | <b>0.035</b> |                        |                 |              |
| SARS-CoV-2 variant                   |                      |             |              |                        |                 |              |
| Omicron (ref)                        | 1 (ref)              |             |              | 1 (ref)                |                 |              |
| Delta                                | 2.01                 | (0.85;4.75) | 0.112        | 2.35                   | (0.97-5.73)     | 0.059        |

aOR (CI 95%): adjusted Odds Ratio (95% confidence interval).

CAPA, COVID-19-associated pulmonary aspergillosis, ICU intensive care unit, SAPS, simplified acute physiology score; SOFA Sequential Organ Failure Assessment.

p-values come from multivariable logistic regression models
