# Supplementary figures and images for: COVID-19 associated pulmonary aspergillosis in critically-ill patients: a prospective multicenter study in the era of Delta and Omicron variants
Source: Springer Nature journal article supplement (doi:10.1186/s13613-024-01296-0), 2024-04-24

**Proven/probable CAPA, N=24**

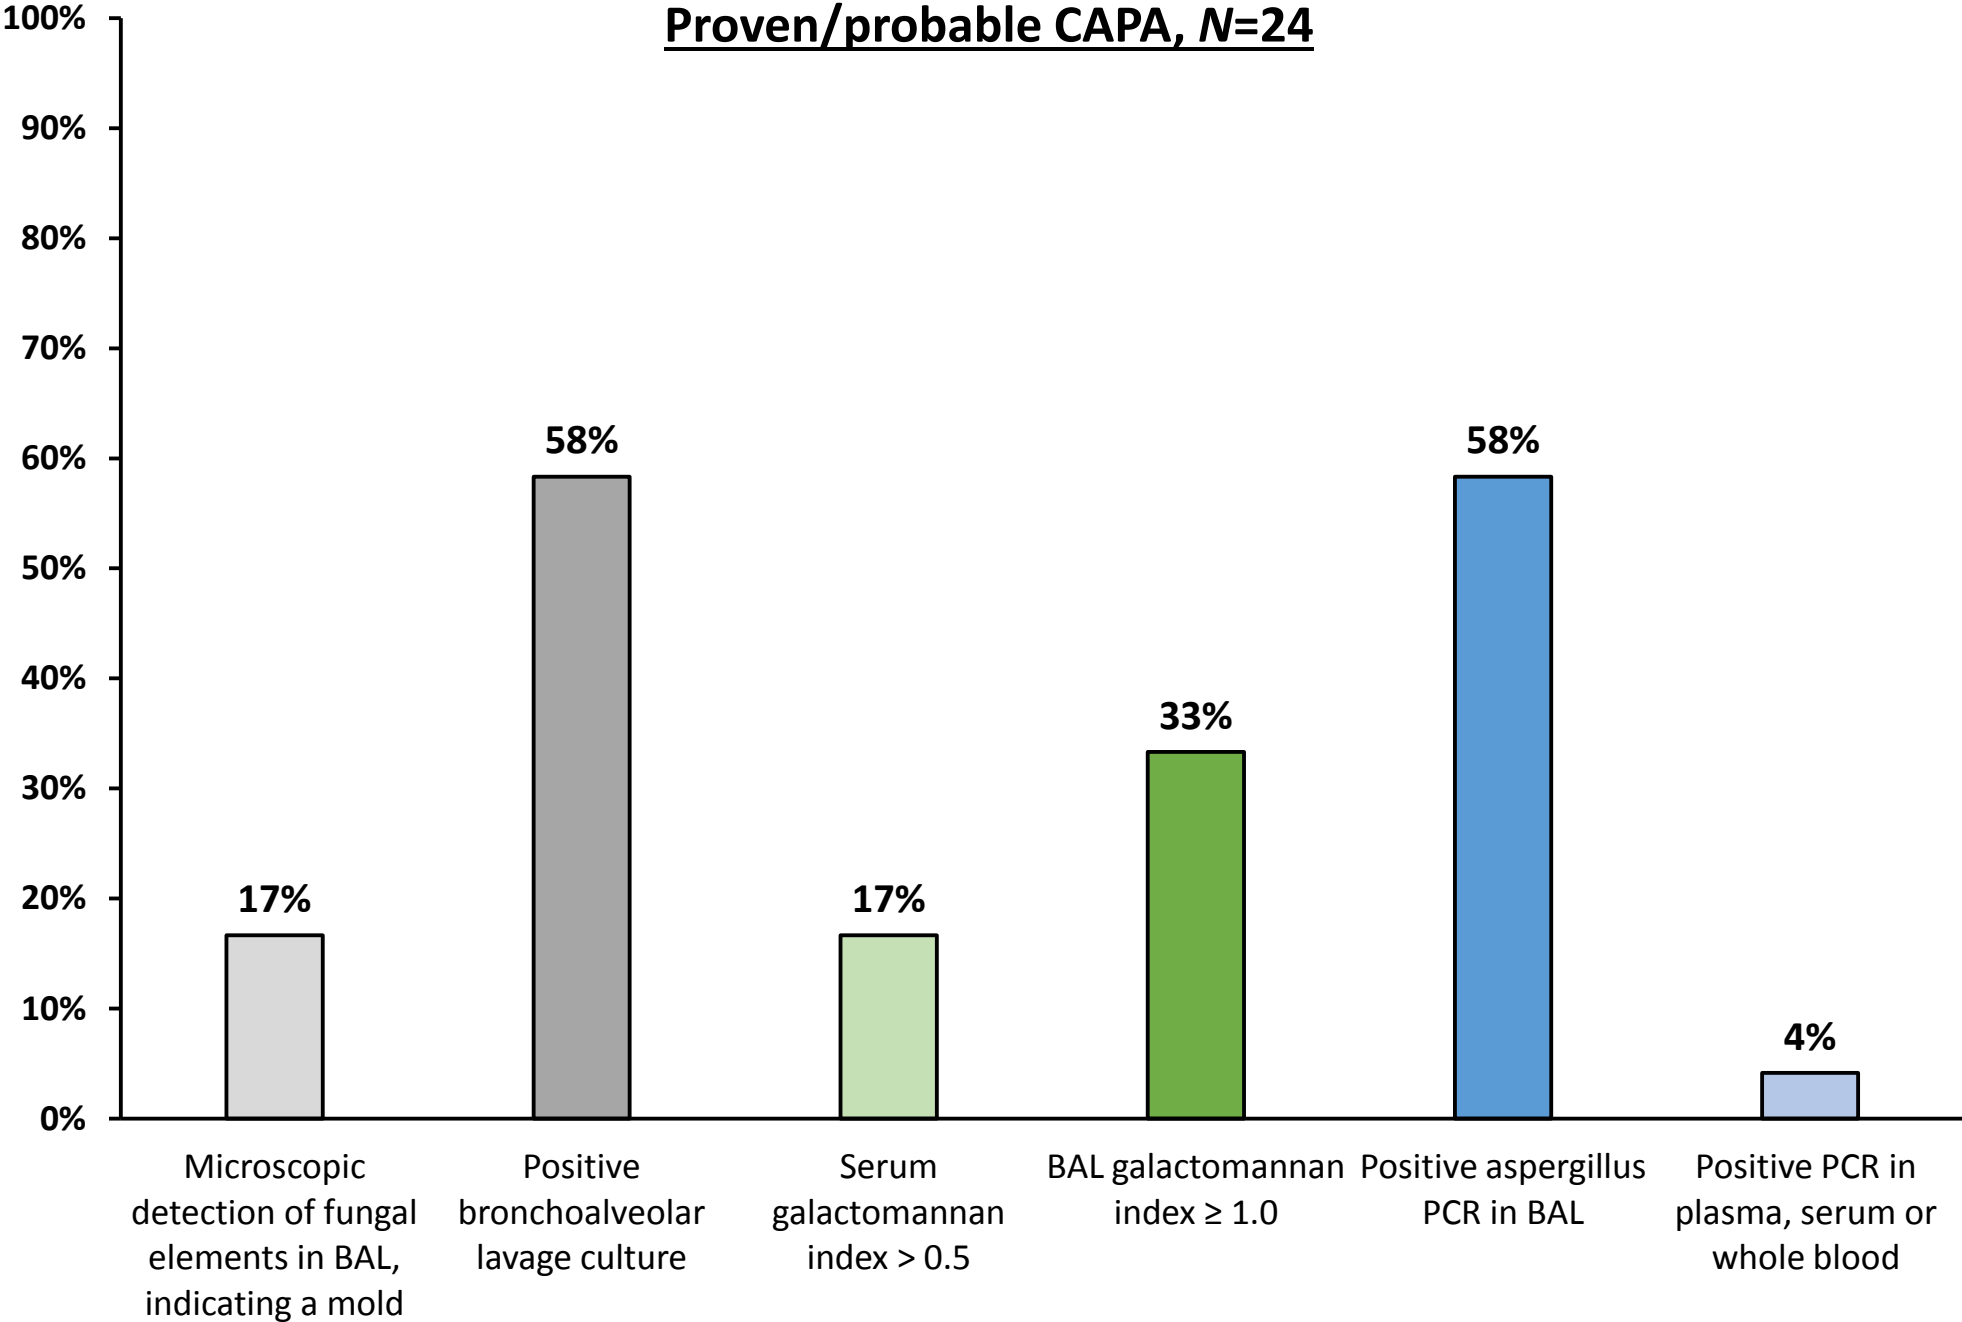

**Possible CAPA, N=5**

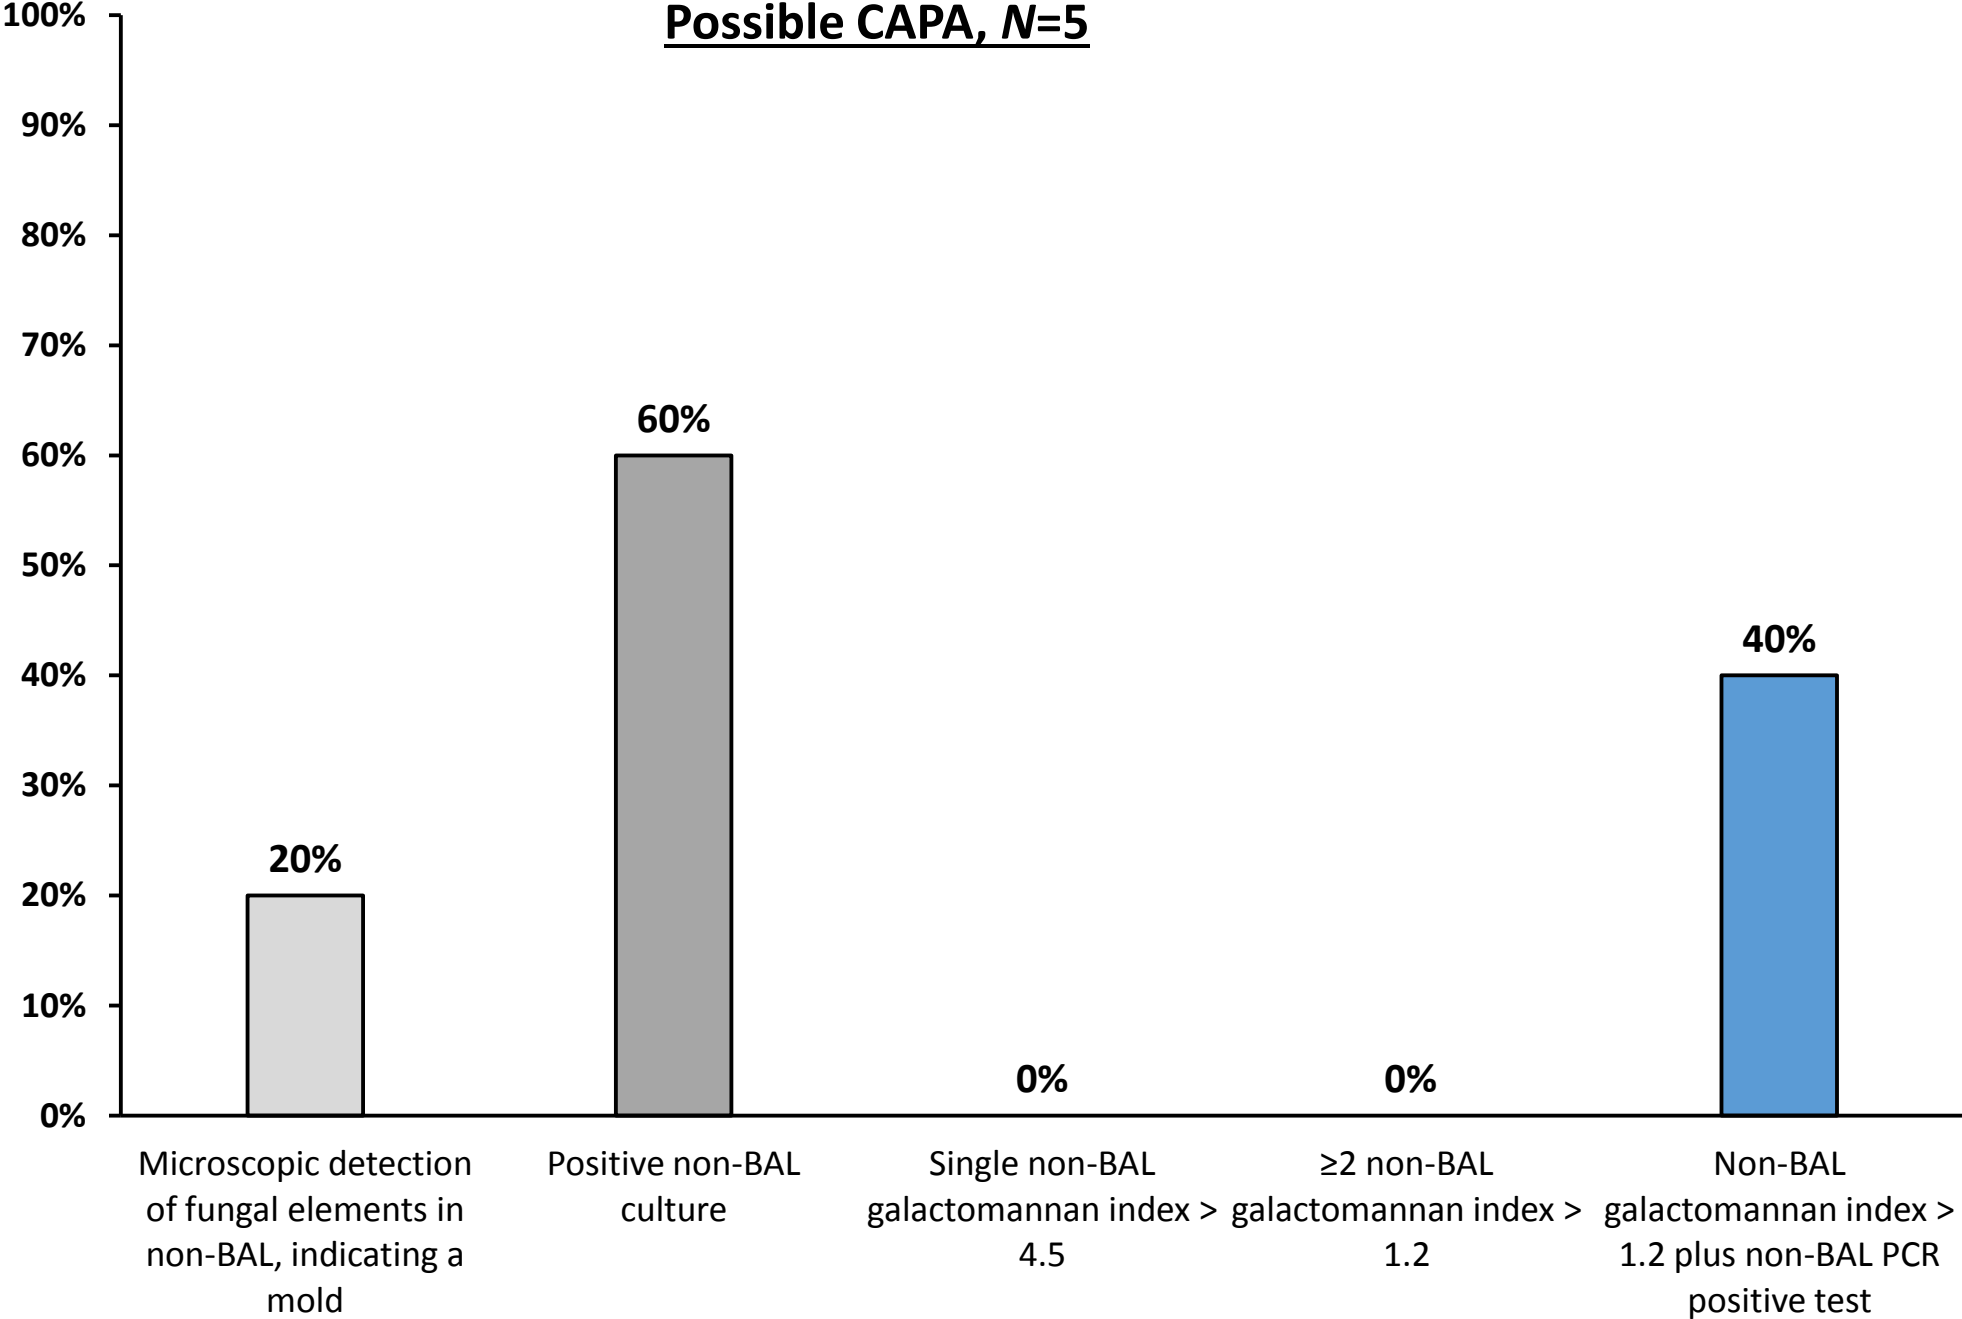

Supplement: MOESM1 [file 13613_2024_1296_MOESM1_ESM.pdf]
